# Supplementary material
Source: PubMed Central journal article supplement (PMC3786571)

# Figure 1

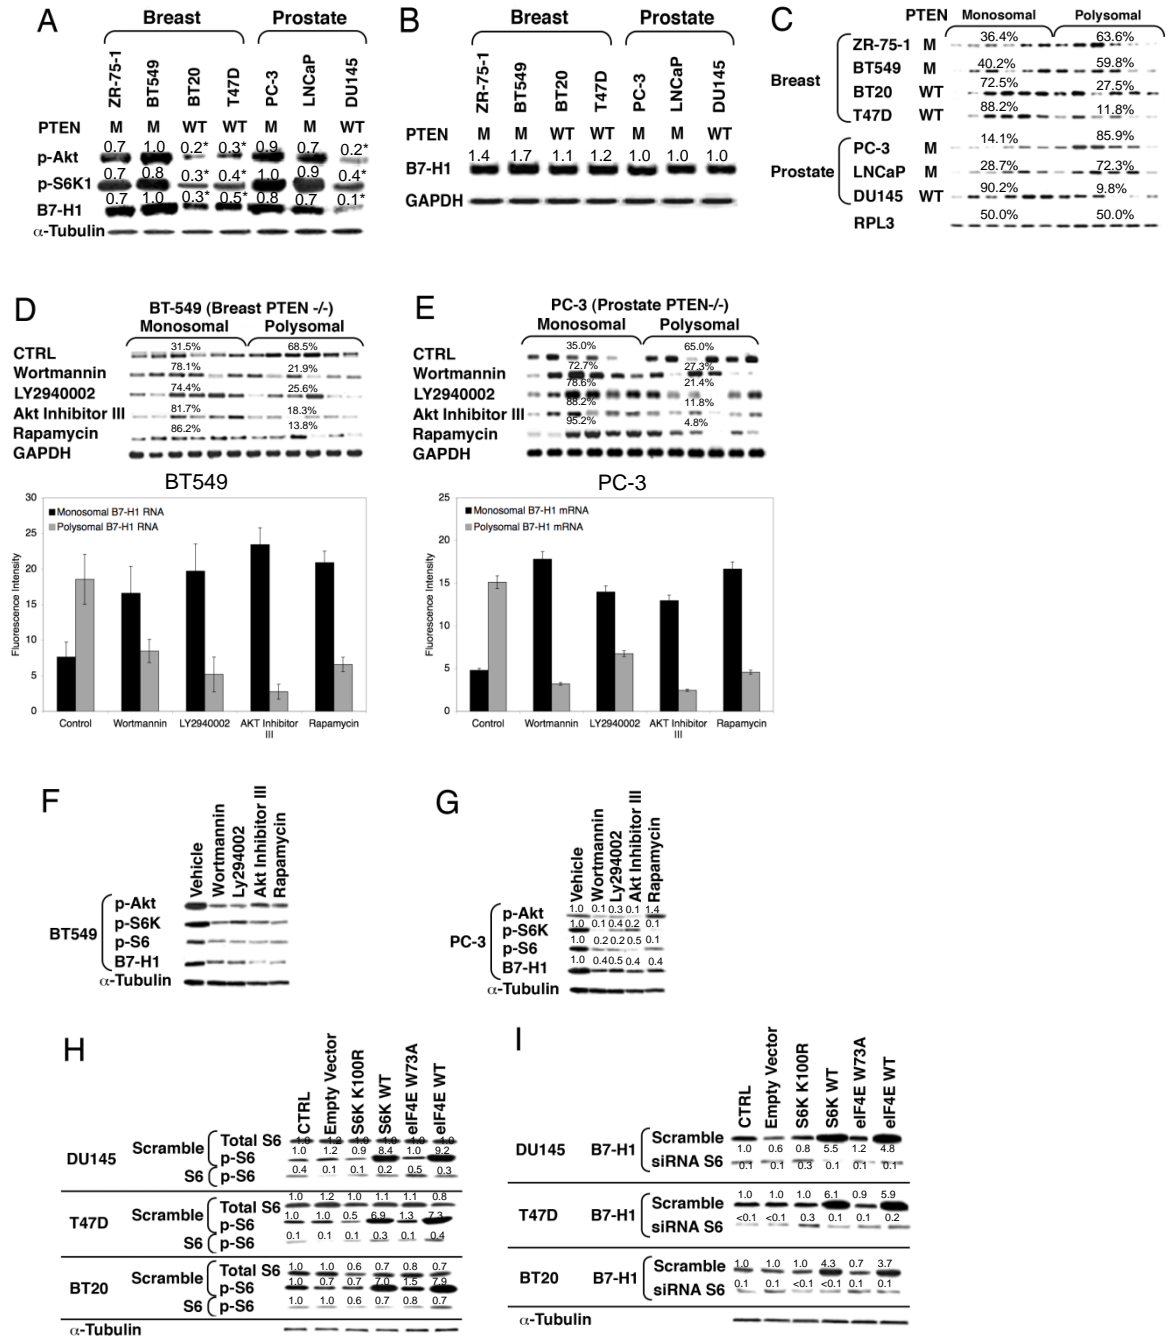

Supplement: NIHMS482671-supplement-Supplementary_Figure_1.pdf [file NIHMS482671-supplement-Supplementary_Figure_1.pdf]

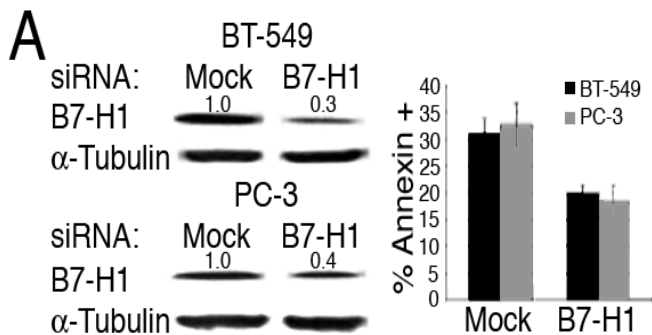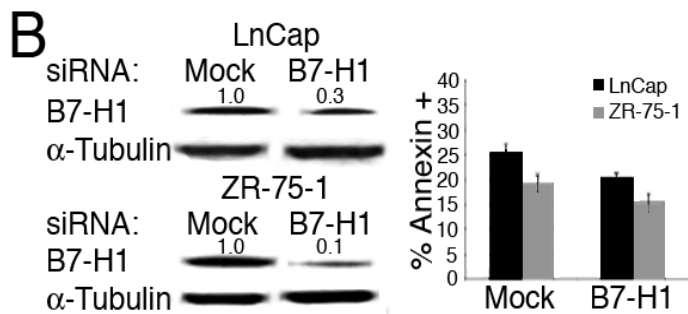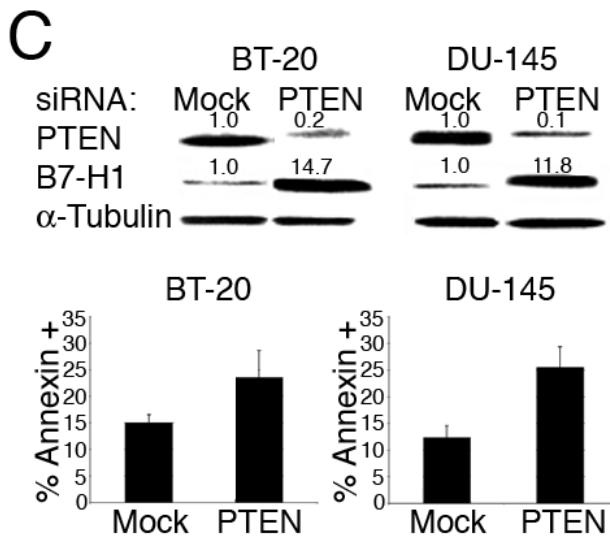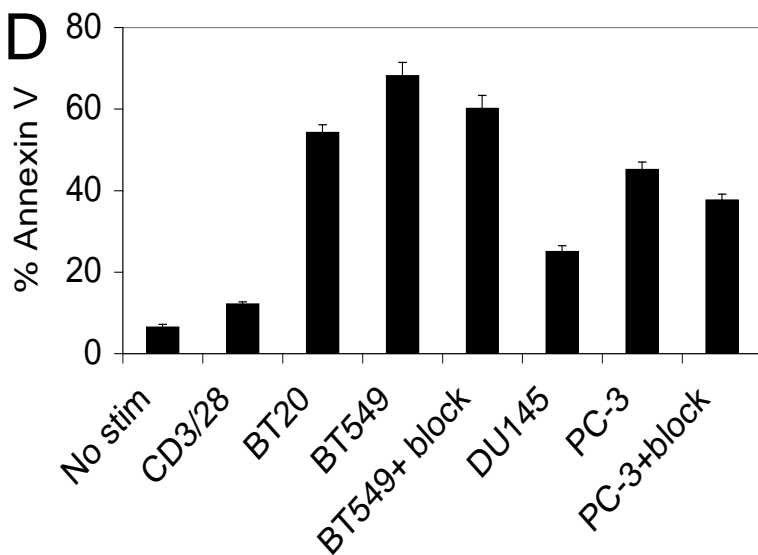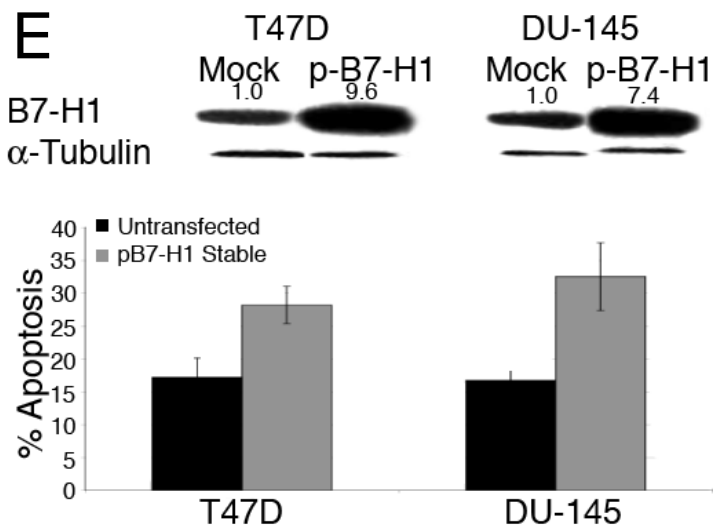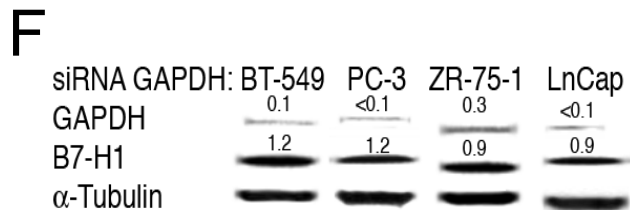

Supplement: NIHMS482671-supplement-Supplementary_Figure_2.pdf [file NIHMS482671-supplement-Supplementary_Figure_2.pdf]
